# Supplementary material for: Nitrate electroreduction to ammonia catalysed by atomically precise Au28Cu12 clusters
Source: Royal Society of Chemistry journal article supplement (doi:10.1039/d4cc02085e), 2024-01-01
Supplement: d4cc02085e1.pdf [file d4cc02085e1.pdf]

## Supporting Information

### 1. Experimental section

#### Synthesis of $[\text{Au}_{28}\text{Cu}_{12}(\text{SR})_{24}](\text{PPh}_4)_4$

20 mg CuCl dissolved in mixture of 10 mL tetrahydrofuran and 10 mL dichloromethane and stirred vigorously. After CuCl was fully dissolved, 32 mg triphenylphosphine-triphenylborane and 30  $\mu\text{L}$   $\text{C}_6\text{H}_4\text{Cl}_2\text{S}$  (2,4-dichlorothiophenol) were added successively. When the solution turned clear light yellow, 27 mg  $\text{Me}_2\text{SAu}$  was added. After stirring for 10 minutes, 30 mg  $\text{NaBH}_4$  in 1 mL cold water was dropwise added. The reaction was carried out at room temperature for 4 hours. The crude products were separated and purified by thin layer chromatography with dichloromethane/petroleum ether as developing agent. Finally, n-hexane was diffused into a solution of acetone for a week to obtain Dark green flake crystals.

#### Synthesis of $\text{Au}_{28}(\text{TBBT})_{20}$

$\text{Au}_{28}(\text{TBBT})_{20}$  (TBBT=4-tert-butylbenzenethiol) was synthesized based on the reported literature.<sup>S1,S2</sup> Firstly, 500 mg  $\text{HAuCl}_4 \cdot 4\text{H}_2\text{O}$  and 675 mg TOAB were dissolved in 35 mL tetrahydrofuran, and 1020  $\mu\text{L}$  2-phenylethanethiol (2-phenylethanethiol=PET) was added under stirring. After the solution became colorless and transparent, 538 mg  $\text{NaBH}_4$  in 8ml cold water was quickly added. The reaction was carried out at 0 °C overnight, and then the product was washed with methanol and extracted with toluene to obtain  $\text{Au}_{25}(\text{PET})_{18}$ . Secondly, 10 mg  $\text{Au}_{25}(\text{PET})_{18}$  and 500  $\mu\text{L}$  4-tert-butylbenzenethiol was added in 500  $\mu\text{L}$  toluene, the solution was stirring at 80 °C oil bath for 2 hours. Finally, the product was washed with methanol and purified by thin-layer chromatography to obtained  $\text{Au}_{28}(\text{TBBT})_{20}$ .

#### Synthesis of $\text{Cu}_{28}(\text{CHT})_{18}(\text{PPh}_3)_3$

100 mg  $\text{Cu}(\text{MeCN})_4\text{BF}_4$  and 80 mg  $\text{PPh}_3$  dissolved in mixture of 4 mL acetonitrile and 1 mL dichloromethane. 30  $\mu\text{L}$  CHT (cyclohexanethiol) was added after the solution turned colorless and transparent. After stirring for 20 minutes, solution turned turbid and 100 mg  $\text{NaBH}_4$  in 5 mL methanol was added immediately. The reaction

was carried out at room temperature for 3 hours. The reaction mixture was centrifuged and the precipitates were washed with methanol and n-hexane successively to obtain the crude product. Finally, n-hexane was diffused into a solution of dichloromethane for a week to obtain red crystals.

### **Electrochemical measurement**

All electrochemical tests were carried in a customized H-type electrolytic cell, in which the anode and cathode compartments were separated by a Nafion 117 membrane. The clusters uniformly coated on 1 cm×cm carbon paper (Toray TGP-H-060) were used as the working electrode, to be specific, ~1 mg clusters were dissolved in 500 μL dichloromethane, the solution was dropped on 1 cm×cm carbon paper which was fixed in platinum electrode clamp. Ag/AgCl (saturated KCl aqueous solution) electrode and platinum sheet electrode were respectively used as reference electrode and counter electrode. All tests for NRA were performed on the electrochemical workstation of Shanghai Chenhua CHI660D. All the electrode potentials in this study were converted to the reversible hydrogen electrode potential (RHE) through  $E_{\text{RHE}} = E_{\text{Ag/AgCl}} + 0.198 \text{ V} + 0.059 \times \text{pH}$ . Before the electrochemical measurements, pure Ar gas was injected into 0.05M H<sub>2</sub>SO<sub>4</sub> with or without 0.5 M NO<sub>3</sub><sup>-</sup> electrolytes for 30 mins to remove oxygen and nitrogen, and then electrodes were activated by implementing cyclic voltammetry (CV) tests at a scan rate of 50 mV/s from +0.25 V to -1.15 V vs. RHE for 50 cycles. The linear voltammetry curve (LSV) was measured at a scanning rate of 10 mV/s from -0.15 V to -1.15 V vs RHE at room temperature. Chronoamperometry test was performed at different potentials for 2 h and the electrolytes were collected to calculate the Faraday efficiency and yield rate of NH<sub>3</sub>. During the chronoamperometry test, the electrolyte in the cathode region was stirred at a speed of 600 rpm, and Ar gas was continuously injected to purify it. The electrochemical impedance spectroscopy (EIS) was performed at 0 V vs. RHE from 10<sup>5</sup> to 10<sup>-2</sup> Hz. The electrochemical active surface area (ECSA) was measured by double layer capacitance method: Firstly, CV curves of clusters were tested at scan rates of 0.02, 0.06, 0.10, 0.14 and 0.18 V/s from 0.10 to 0.30 V vs RHE. Then the linear fitting of CV curve area under different scan speed was carried out,

and the slope of the fitting line was the double electric layer capacitance which can reflected the value of ECSA.

### **Characterization**

The UV–vis spectra were characterized by a Shimadzu UV-1800 UV-vis spectrometer. The single crystal X-ray diffraction data of  $[\text{Au}_{28}\text{Cu}_{12}(\text{SR})_{24}](\text{PPh}_4)_4$  were collected on a Bruker D8 VENTURE with Mo  $K\alpha$  radiation ( $\lambda = 0.71073 \text{ \AA}$ ) at 296.2 K. The single crystal X-ray diffraction data of  $\text{Cu}_{28}(\text{CHT})_{18}(\text{PPh}_3)_3$  were collected on a Bruker D8 VENTURE with Cu  $K\alpha$  radiation ( $\lambda = 1.54178 \text{ \AA}$ ) at 193.2 K. Electrospray ionization (ESI) mass spectra of  $\text{Au}_{28}(\text{DMPA})_{20}$  were collected using a Z spray source on a Waters Q-TOF mass spectrometer. The cluster sample was dissolved in toluene (0.5 mg/mL) and then the solution was diluted with methanol solution containing 50 mmol/L  $\text{Cs}_2\text{CO}_3$  (2:1 V/V). The liquid products were determined by  $^1\text{H}$  NMR on BRUKER AVANCE III 400 MHz with Dimethyl sulfoxide (DMSO) as internal standard.

### **Determination of $\text{H}_2$ and $\text{N}_2$**

During the reaction, the electrolyte in the cathode region was stirred at a speed of 600 rpm, and Ar gas was continuously injected at a gas flow rate of 18 mL/min. Every 100 minutes, the exhaust gas from the cathode region was analyzed by a gas chromatograph equipped with a thermal conductivity detector (TCD).

### **Determination of $\text{NH}_3\text{-N}$ concentration by $^1\text{H}$ NMR**

9 mL electrolyte after the reaction, 1 mL  $\text{D}_2\text{O}$  and 1  $\mu\text{L}$  DMSO (internal standard) were added into glass bottle. After mixing evenly, 500  $\mu\text{L}$  solution was added into the nuclear magnetic tube, which was tested by BRUKER AVANCE III 400 MHz at ambient condition.

### **Determination of ion concentration by colorimetry**

Determination of  $\text{NH}_3\text{-N}$ :  $\text{NH}_3\text{-N}$  was determined using Nessler's reagent as the color reagent. 5  $\mu\text{L}$  electrolyte after the reaction was diluted to 5 mL, 10  $\mu\text{L}$  5 M NaOH aqueous solution was added to adjust the pH. 120  $\mu\text{L}$  potassium sodium tartrate solution ( $\rho = 500 \text{ g/L}$ ) was added and mixed thoroughly, then 150  $\mu\text{L}$  Nessler's

reagent was added. The absorption intensity at a wavelength of 420 nm was recorded after sitting for 10 min.

Determination of  $\text{NO}_2^-$ -N: A mixture of *p*-aminobenzenesulfonamide (4 g), N-(1-Naphthyl) ethylenediamine dihydrochloride (0.2 g), ultrapure water (50 mL) and phosphoric acid (10 mL,  $\rho = 1.70 \text{ g/mL}$ ) was used as a color reagent. 100  $\mu\text{L}$  color reagent was added into 5 mL electrolyte and mixed uniformly. The absorption intensity at a wavelength of 540 nm was recorded after sitting for 10 min.

Determination of  $\text{N}_2\text{H}_4$ -N: Watt-Chrisps methods were used to detect the content of  $\text{N}_2\text{H}_4$ . The mixture of 4-Dimethylaminobenzaldehyde (4 g), concentrated HCl (20 mL) and ethanol (200 mL) is the color reagent. 5 mL color reagent was added into 5 mL electrolyte and mixed uniformly. The absorption intensity at a wavelength of 458 nm was recorded after sitting for 10 min.

## 2. Supporting Figures and Tables

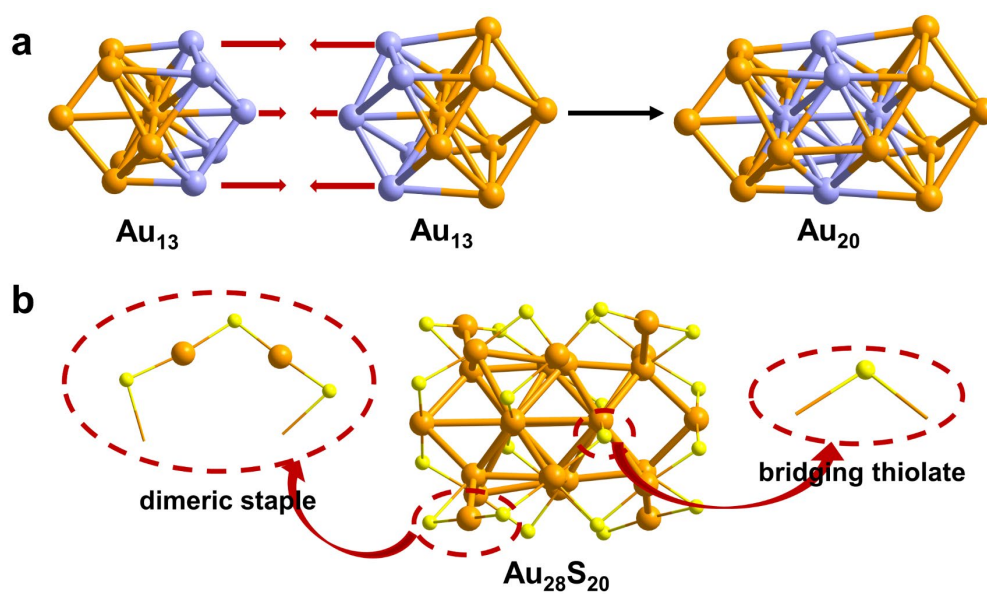

**Figure S1.** (a)  $\text{Au}_{20}$  core of  $\text{Au}_{28}(\text{TBBT})_{20}$ . (b) Dimeric staples  $\text{Au}_2(\text{TBBT})_3$  and bridging thiolates of  $\text{Au}_{28}(\text{TBBT})_{20}$ . Color code: orange/purple, Au; yellow: S. The C and H atoms are omitted for clarity.

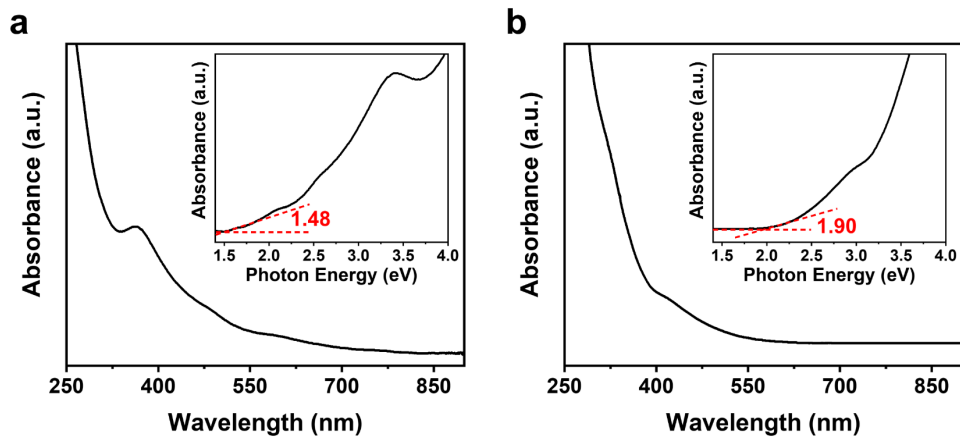

**Figure S2.** UV-vis spectra of (a)  $\text{Au}_{28}(\text{TBBT})_{20}$  and (b)  $\text{Cu}_{28}(\text{CHO})_{18}(\text{PPh}_3)_3$ . The insets are the corresponding the photon energy scales.

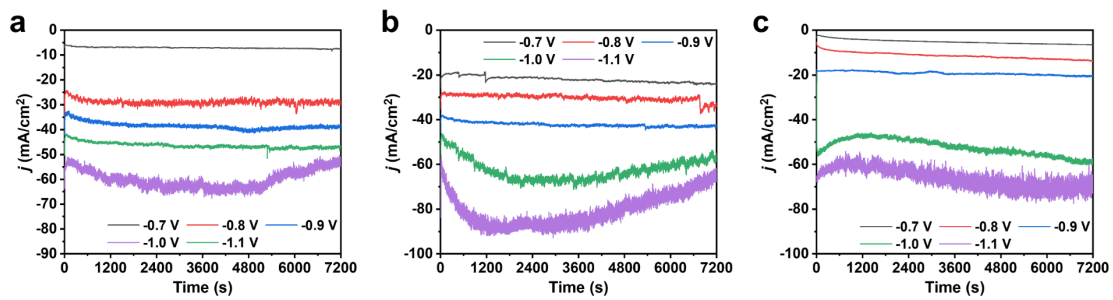

**Figure S3.** I-t curves of (a) Au<sub>28</sub>Cu<sub>12</sub>, (b) Au<sub>28</sub> and (c) Cu<sub>28</sub> from -0.7 to -1.1 V vs. RHE in 0.05 M H<sub>2</sub>SO<sub>4</sub> electrolyte with 0.5 M KNO<sub>3</sub>.

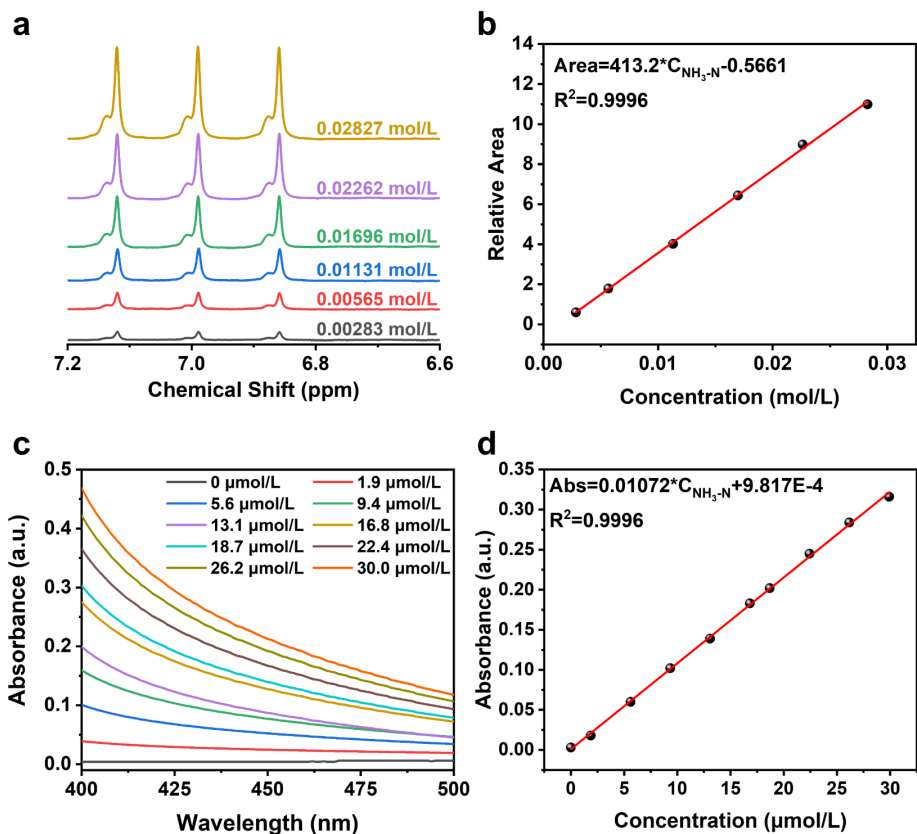

**Figure S4.** (a) <sup>1</sup>H NMR spectra and (c) UV-vis spectra of NH<sub>4</sub><sup>+</sup>. The standard curves of NH<sub>3</sub>-N concentration obtained by (b) <sup>1</sup>H NMR and (d) Nessler's reagent spectrophotometry.



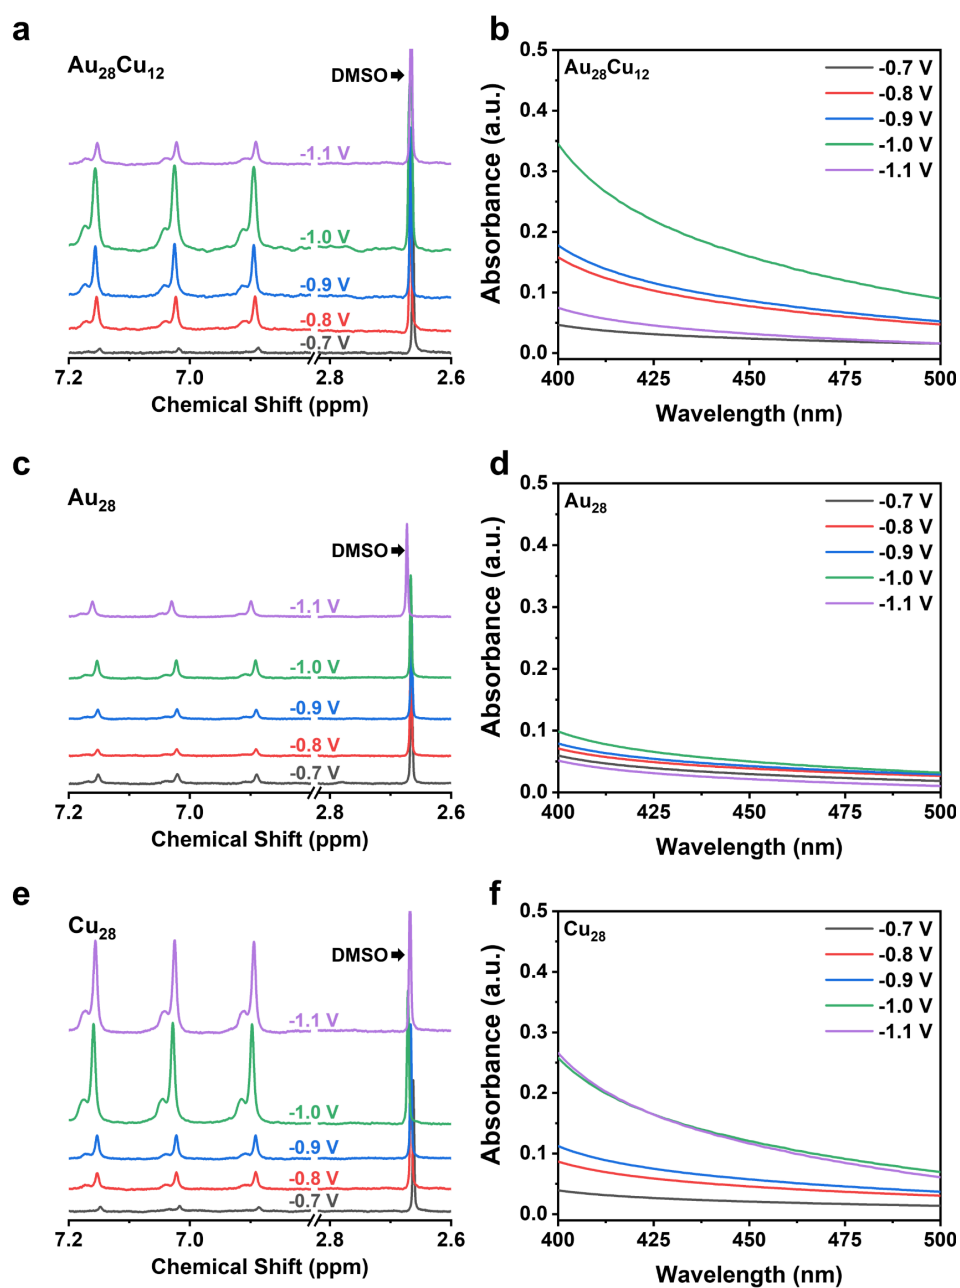

**Figure S5.**  $^1\text{H}$  NMR spectra to measure  $\text{NH}_4^+$  of electrolytes after the I-t tests obtained by different electrolytic conditions over (a)  $\text{Au}_{28}\text{Cu}_{12}$ , (c)  $\text{Au}_{28}$  and (e)  $\text{Cu}_{28}$ , respectively. UV-vis spectra to measure  $\text{NH}_4^+$  of electrolytes after the I-t tests obtained by different electrolytic conditions over (b)  $\text{Au}_{28}\text{Cu}_{12}$ , (d)  $\text{Au}_{28}$  and (f)  $\text{Cu}_{28}$ , respectively.

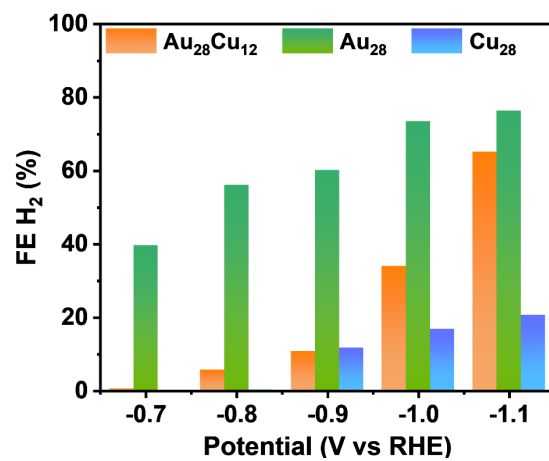

**Figure S6.** Potential-dependent H<sub>2</sub> faradaic efficiency of Au<sub>28</sub>Cu<sub>12</sub>, Au<sub>28</sub> and Cu<sub>28</sub> in 0.05 M H<sub>2</sub>SO<sub>4</sub> electrolyte with 0.5 M KNO<sub>3</sub>.

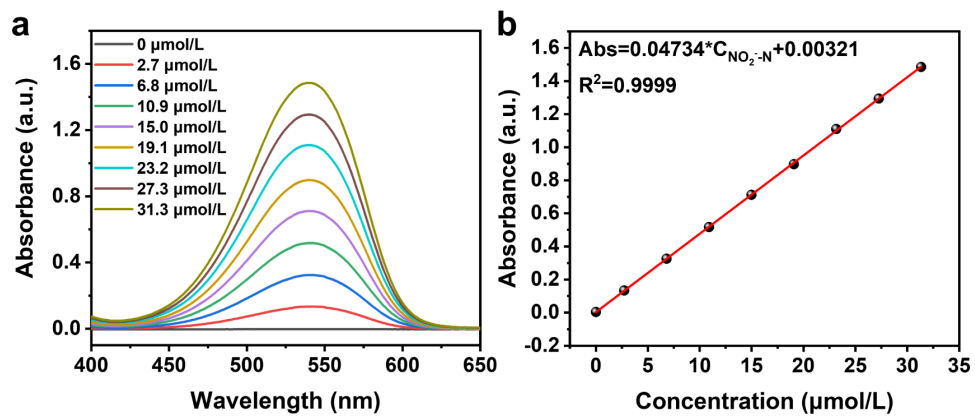

**Figure S7.** (a) UV-vis spectra of  $\text{NO}_2^-$ . (b) The standard curve of  $\text{NO}_2^-$ -N concentration obtained by colorimetry.

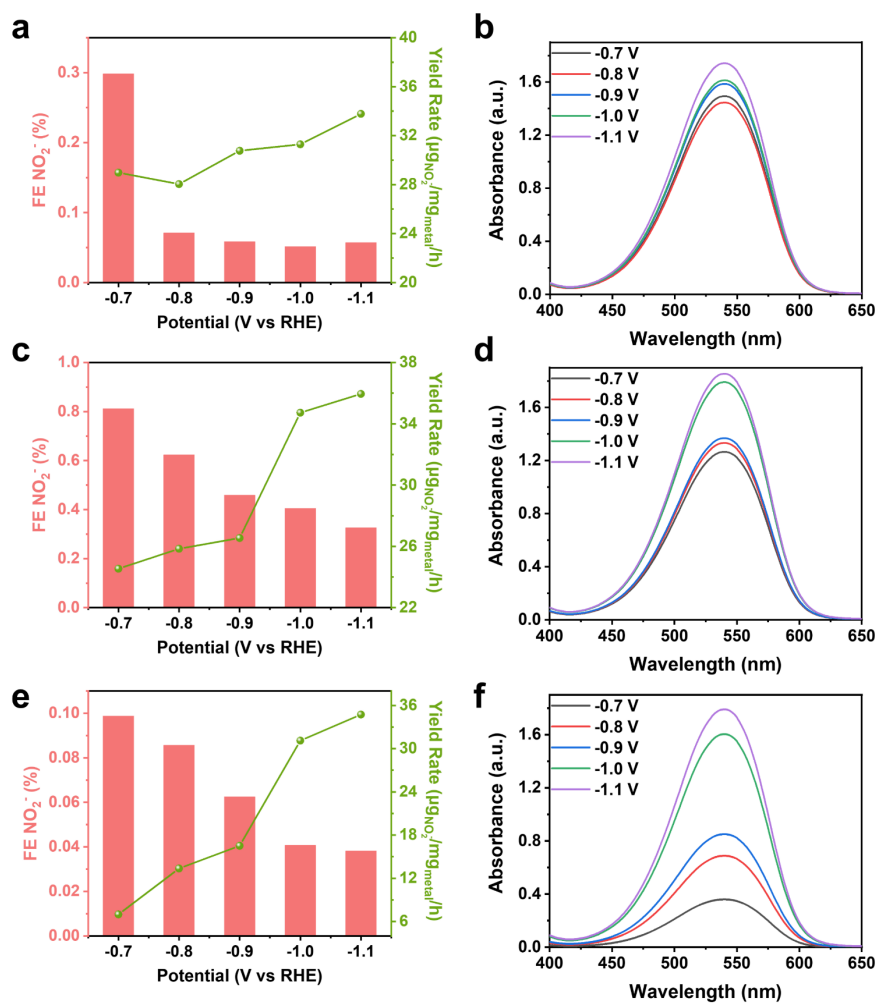

**Figure S8.** FEs and yield rates of NO<sub>2</sub><sup>-</sup> over (a) Au<sub>28</sub>Cu<sub>12</sub>, (c) Au<sub>28</sub> and (e) Cu<sub>28</sub> clusters, respectively. UV-vis absorption spectra to measure NO<sub>2</sub><sup>-</sup> of electrolytes after the I-t tests obtained by different electrolytic conditions over (b) Au<sub>28</sub>Cu<sub>12</sub>, (d) Au<sub>28</sub> and (f) Cu<sub>28</sub> clusters.

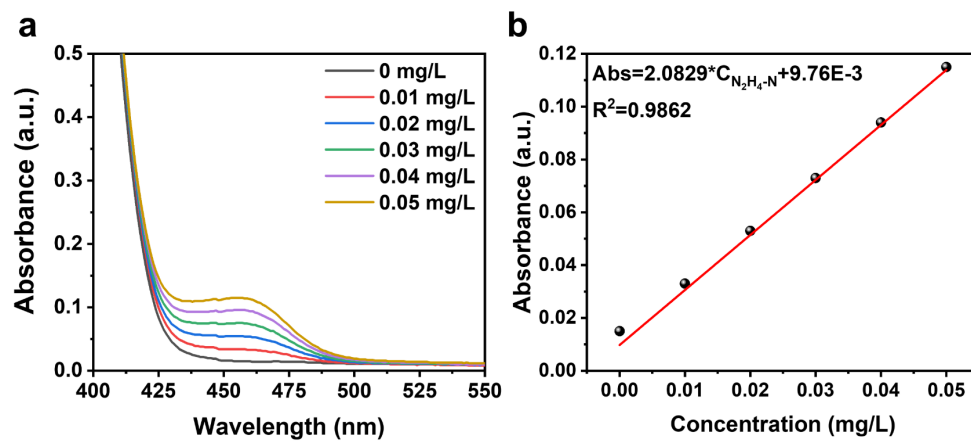

**Figure S9.** (a) UV-vis absorption spectra of  $N_2H_4$ . (b) The standard curve of  $N_2H_4-N$  concentration obtained by colorimetry.

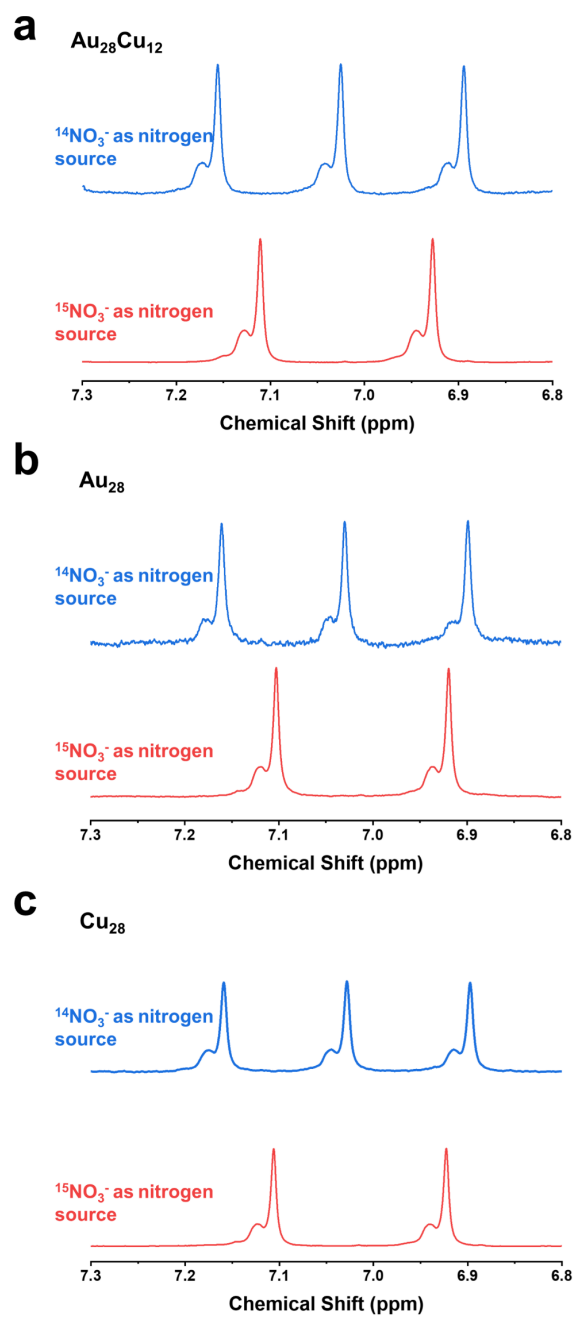

**Figure S10.**  $^1\text{H}$  NMR spectra of the products generated after electrocatalytic NRA reaction in 0.05 M  $\text{H}_2\text{SO}_4$  electrolyte with 0.5 M  $^{14}\text{NO}_3^-$  and  $^{15}\text{NO}_3^-$  at -0.8 V vs RHE over (a)  $\text{Au}_{28}\text{Cu}_{12}$ , (b)  $\text{Au}_{28}$  and (c)  $\text{Cu}_{28}$ .

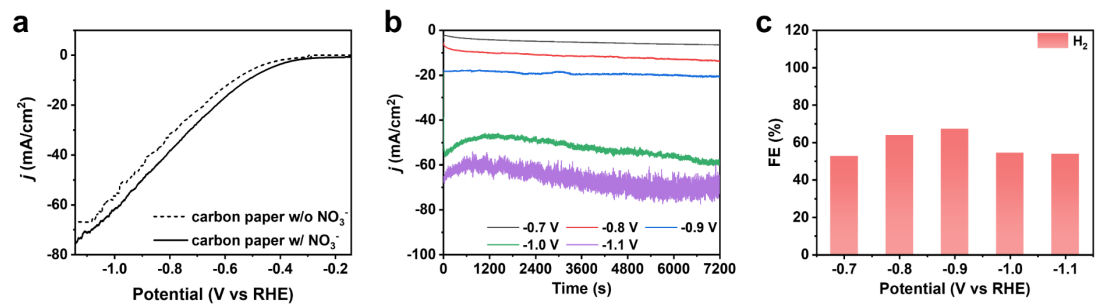

**Figure S11.** (a) LSV curves of carbon paper in 0.05 M H<sub>2</sub>SO<sub>4</sub> electrolyte with or without NO<sub>3</sub><sup>-</sup>. (b) I-t curves of carbon paper from -0.7 to -1.1 V. (c) H<sub>2</sub> FEs over carbon paper. RHE in 0.05 M H<sub>2</sub>SO<sub>4</sub> electrolyte with 0.5 M KNO<sub>3</sub>.

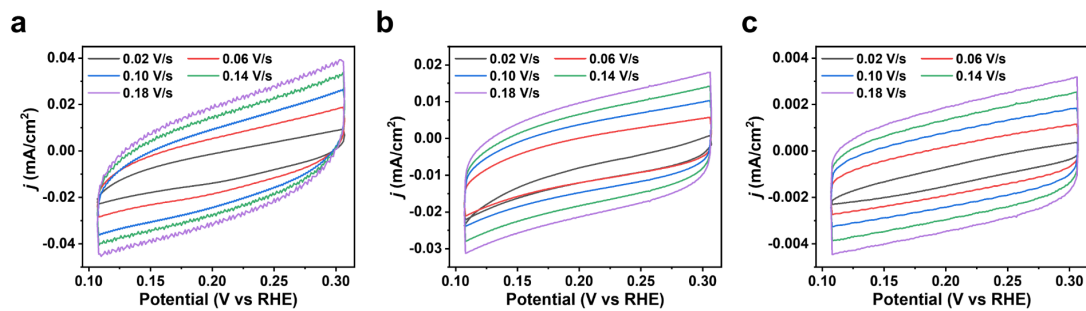

**Figure S12.** The CV curves in the non-faradaic region of (a)  $\text{Au}_{28}\text{Cu}_{12}$ , (b)  $\text{Au}_{28}$  and (c)  $\text{Cu}_{28}$  clusters, respectively.



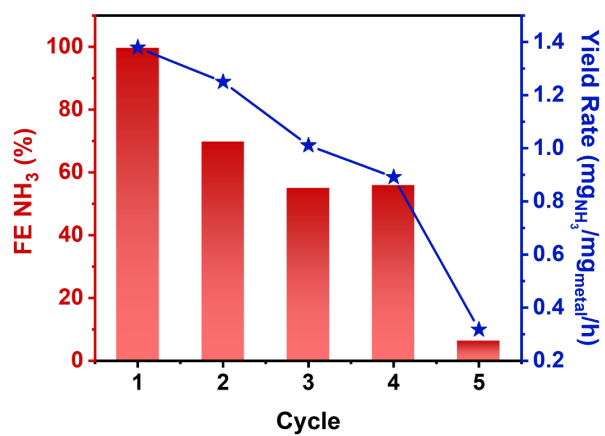

**Figure S13.** Recycling test at -0.8 V vs RHE of the Cu<sub>28</sub> cluster.

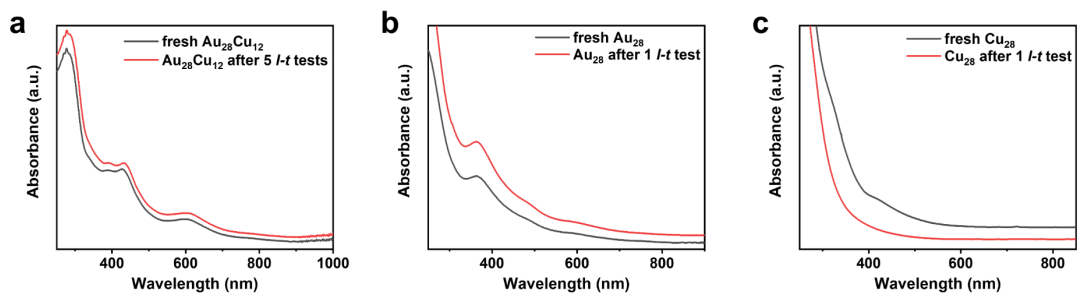

**Figure S14.** UV-vis spectra of the clusters before and after  $I-t$  tests at  $-0.8$  V: (a) Au<sub>28</sub>Cu<sub>12</sub>, (b) Au<sub>28</sub> and (c) Cu<sub>28</sub> clusters. (The spent clusters were dissolved from carbon paper by dichloromethane.)

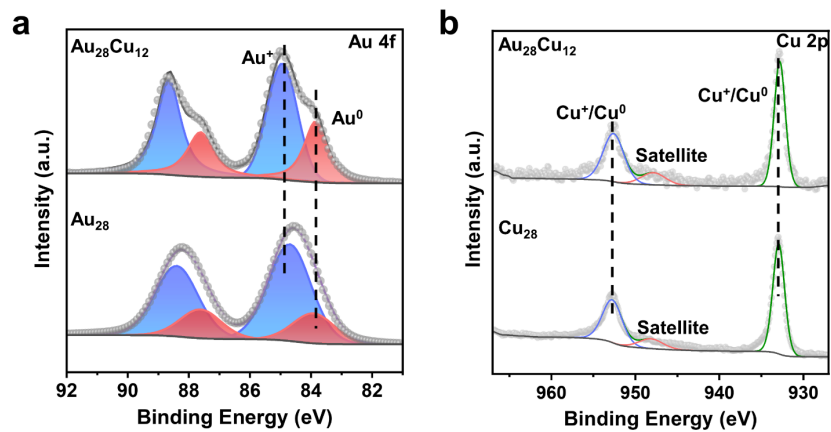

**Figure S15.** XPS profiles of the spent clusters after  $I-t$  tests at  $-0.8$  V: (a) Au 4f XPS profiles; (b) Cu 2p XPS profiles.

**Table S1.** Binding energy values of Au species and their relative quantities in the Au<sub>28</sub>Cu<sub>12</sub> and Au<sub>28</sub> clusters.

| Sample                            | Binding energy of Au species (eV) |                 |                      |                 | Relative amount of Au species |                 |
|-----------------------------------|-----------------------------------|-----------------|----------------------|-----------------|-------------------------------|-----------------|
|                                   | Au 4f <sub>5/2</sub>              |                 | Au 4f <sub>7/2</sub> |                 | Au <sup>0</sup>               | Au <sup>+</sup> |
|                                   | Au <sup>0</sup>                   | Au <sup>+</sup> | Au <sup>0</sup>      | Au <sup>+</sup> |                               |                 |
| Au <sub>28</sub> Cu <sub>12</sub> | 87.6                              | 88.5            | 83.9                 | 84.8            | 39.68%                        | 60.32%          |
| Au <sub>28</sub>                  | 87.6                              | 88.5            | 83.9                 | 84.8            | 21.84%                        | 78.16%          |

**Table S2.** Crystal data and structure refinement for the [Au<sub>28</sub>Cu<sub>12</sub>(SR)<sub>24</sub>](PPh<sub>4</sub>)<sub>4</sub> cluster.

|                                   |                                                                                                                      |                 |
|-----------------------------------|----------------------------------------------------------------------------------------------------------------------|-----------------|
| Empirical formula                 | C <sub>240</sub> H <sub>152</sub> Au <sub>28</sub> Cl <sub>148</sub> Cu <sub>12</sub> P <sub>4</sub> S <sub>24</sub> |                 |
| Formula weight                    | 11908.07                                                                                                             |                 |
| Temperature                       | 296(2) K                                                                                                             |                 |
| Wavelength                        | 0.71073 Å                                                                                                            |                 |
| Crystal system                    | Triclinic                                                                                                            |                 |
| Space group                       | P-1                                                                                                                  |                 |
| Unit cell dimensions              | a = 22.0728(13) Å                                                                                                    | a = 86.596(2)°. |
|                                   | b = 27.5087(14) Å                                                                                                    | b = 78.050(2)°. |
|                                   | c = 27.5493(15) Å                                                                                                    | g = 88.550(2)°. |
| Volume                            | 16334.9(16) Å <sup>3</sup>                                                                                           |                 |
| Z                                 | 2                                                                                                                    |                 |
| Density (calculated)              | 2.421 Mg/m <sup>3</sup>                                                                                              |                 |
| Absorption coefficient            | 13.884 mm <sup>-1</sup>                                                                                              |                 |
| F(000)                            | 10824                                                                                                                |                 |
| Theta range for data collection   | 1.998 to 25.027°.                                                                                                    |                 |
| Index ranges                      | -20 ≤ h ≤ 26, -32 ≤ k ≤ 32, -32 ≤ l ≤ 32                                                                             |                 |
| Reflections collected             | 119291                                                                                                               |                 |
| Completeness to theta = 25.027°   | 99.4 %                                                                                                               |                 |
| Refinement method                 | Full-matrix least-squares on F <sup>2</sup>                                                                          |                 |
| Data / restraints / parameters    | 57407 / 8160 / 3013                                                                                                  |                 |
| Goodness-of-fit on F <sup>2</sup> | 1.212                                                                                                                |                 |
| Final R indices [I > 2σ(I)]       | R1 = 0.0907, wR2 = 0.2200                                                                                            |                 |
| R indices (all data)              | R1 = 0.1293, wR2 = 0.2435                                                                                            |                 |
| Extinction coefficient            | n/a                                                                                                                  |                 |
| Largest diff. peak and hole       | 7.198 and -7.207 e.Å <sup>-3</sup>                                                                                   |                 |

**Table S3.** Crystal data and structure refinement for the  $\text{Cu}_{28}(\text{CMT})_{18}(\text{PPh}_3)_3$  cluster.

|                                   |                                                                                   |                 |
|-----------------------------------|-----------------------------------------------------------------------------------|-----------------|
| Empirical formula                 | C <sub>162</sub> H <sub>243</sub> Cu <sub>28</sub> P <sub>3</sub> S <sub>18</sub> |                 |
| Formula weight                    | 4639.66                                                                           |                 |
| Temperature                       | 193(2) K                                                                          |                 |
| Wavelength                        | 1.54178 Å                                                                         |                 |
| Crystal system                    | Monoclinic                                                                        |                 |
| Space group                       | P2 <sub>1</sub> /n                                                                |                 |
| Unit cell dimensions              | a = 19.6220(11) Å                                                                 | a = 90°.        |
|                                   | b = 39.5629(18) Å                                                                 | b = 91.255(3)°. |
|                                   | c = 26.1094(12) Å                                                                 | g = 90°.        |
| Volume                            | 20264.0(17) Å <sup>3</sup>                                                        |                 |
| Z                                 | 4                                                                                 |                 |
| Density (calculated)              | 1.521 Mg/m <sup>3</sup>                                                           |                 |
| Absorption coefficient            | 5.310 mm <sup>-1</sup>                                                            |                 |
| F(000)                            | 9440                                                                              |                 |
| Theta range for data collection   | 3.059 to 68.568°.                                                                 |                 |
| Index ranges                      | -23 ≤ h ≤ 23, 0 ≤ k ≤ 47, 0 ≤ l ≤ 31                                              |                 |
| Reflections collected             | 36264                                                                             |                 |
| Completeness to theta = 67.679°   | 94.1 %                                                                            |                 |
| Refinement method                 | Full-matrix least-squares on F <sup>2</sup>                                       |                 |
| Data / restraints / parameters    | 36264 / 4330 / 1826                                                               |                 |
| Goodness-of-fit on F <sup>2</sup> | 0.985                                                                             |                 |
| Final R indices [I > 2σ(I)]       | R1 = 0.1083, wR2 = 0.2575                                                         |                 |
| R indices (all data)              | R1 = 0.1626, wR2 = 0.2931                                                         |                 |
| Extinction coefficient            | n/a                                                                               |                 |
| Largest diff. peak and hole       | 1.300 and -0.736 e.Å <sup>-3</sup>                                                |                 |

**Table S4.** Comparison of ammonia selectivity by electrocatalytic nitrate reduction.

| Electrocatalyst                   | Electrolyte                                                                  | NO <sub>3</sub> <sup>-</sup> efficiency | Reference |
|-----------------------------------|------------------------------------------------------------------------------|-----------------------------------------|-----------|
| Au <sub>28</sub> Cu <sub>12</sub> | 0.5 M KNO <sub>3</sub> +0.05 M H <sub>2</sub> SO <sub>4</sub>                | 97%                                     | This work |
| Au <sub>28</sub>                  | 0.5 M KNO <sub>3</sub> +0.05 M H <sub>2</sub> SO <sub>4</sub>                | 41%                                     | This work |
| Cu <sub>28</sub>                  | 0.5 M KNO <sub>3</sub> +0.05 M H <sub>2</sub> SO <sub>4</sub>                | 99.8%                                   | This work |
| Au/Cu SAAs                        | 100 ppm NO <sub>3</sub> <sup>-</sup> +0.5 M Na <sub>2</sub> SO <sub>4</sub>  | 98.3%                                   | S3        |
| Cu/Cu <sub>2</sub> O              | 200 ppm NO <sub>3</sub> <sup>-</sup> + 0.5 M Na <sub>2</sub> SO <sub>4</sub> | 97%                                     | S4        |
| Cu/GO/Ti                          | 50 ppm NO <sub>3</sub> <sup>-</sup> + 0.05 M Na <sub>2</sub> SO <sub>4</sub> | 91.5%                                   | S5        |
| para-MBA-Au/C                     | 1.0 M KOH + 0.1 MKNO <sub>3</sub>                                            | 98.7%                                   | S6        |
| Au-NC/TiO <sub>2</sub>            | 0.2 M Na <sub>2</sub> SO <sub>4</sub> + 0.05 M NaNO <sub>3</sub>             | 91%                                     | S7        |

### 3. Supporting references

- S1 Z. Wu, J. Suhan and R. Jin, *J. Mater. Chem.*, 2009, **19**, 622-626.
- S2 C. Zeng, Y. Chen, K. Iida, K. Nobusada, K. Kirschbaum, K. J. Lambright and R. Jin, *J. Am. Chem. Soc.*, 2016, **138**, 3950-3953.
- S3 H. Yin, Y. Peng and J. Li, *Environ. Sci. Technol.*, 2023, **57**, 3134-3144.
- S4 Y. Wang, W. Zhou, R. Jia, Y. Yu and B. Zhang, *Angew. Chem. Int. Ed. Engl.*, 2020, **59**, 5350-5354.
- S5 J. Wang, S. Wang, Z. Zhang and C. Wang, *J. Environ. Manage.*, 2020, **276**, 111357.
- S6 Y. Wu, X. Kong, Y. Su, J. Zhao, Y. Ma, T. Ji, D. Wu, J. Meng, Y. Liu, Z. Geng and J. Zeng, *Precis. Chem.*, 2024, **2**, 112-119.
- S7 M. Yang, T. Wei, J. He, Q. Liu, L. Feng, H. Li, J. Luo and X. Liu, *Nano Res.*, 2024, **17**, 1209-1216.
